# Supplementary material for: Synthetic BZLF1-targeted transcriptional activator for efficient lytic induction therapy against EBV-associated epithelial cancers
Source: PubMed Central journal article supplement (PMC11068728; doi:10.1038/s41467-024-48031-8), 2024-05-03
Supplement: 41467_2024_48031_MOESM3_ESM.pdf [file 41467_2024_48031_MOESM3_ESM.pdf]

## **Description of Additional Supplementary Files**

### **Supplementary Data Legends:**

**Supplementary Data 1.** Differentially expressed genes induced by mTZ3-LNP treatment in SNU719 cells.

**Supplementary Data 2.** Differentially expressed genes induced by mTZ3-LNP treatment in C666-1 cells
